# Supplementary material
Source: HighWire-hosted journal article supplement (https://bmjpaedsopen.bmj.com/content/6/1/e001390)
Supplement: inline-supplementary-material-1 [file inline-supplementary-material-1.pdf]

**Supplementary Table 1:** Estimated probabilities over time (by survey) and by state/territory (as a proxy for total length of lockdown) for the three mental health measures (graphed in Figure 1)

## A. Poor caregiver mental health (Kessler-6)

|                                    | Proportion <sup>a, b</sup> | Risk Difference <sup>a, b</sup> | 95% Confidence Interval <sup>a, b</sup> |       | p-values <sup>a, b</sup> |
|------------------------------------|----------------------------|---------------------------------|-----------------------------------------|-------|--------------------------|
|                                    |                            |                                 | Lower                                   | Upper |                          |
| <b>Other States + W1 June 2020</b> | 0.12                       |                                 |                                         |       |                          |
| <b>Other States + W2 Sep 2020</b>  | 0.17                       | 0.05                            | -0.01                                   | 0.10  | 0.093                    |
| <b>Other States + W3 July 2021</b> | 0.13                       | 0.01                            | -0.02                                   | 0.04  | 0.589                    |
| <b>NSW + W1 June 2020</b>          | 0.19                       | 0.07                            | 0.02                                    | 0.12  | 0.005                    |
| <b>NSW + W2 Sep 2020</b>           | 0.17                       | 0.05                            | 0.01                                    | 0.10  | 0.024                    |
| <b>NSW + W3 July 2021</b>          | 0.23                       | 0.11                            | 0.06                                    | 0.15  | 0.000                    |
| <b>VIC + W1 June 2020</b>          | 0.17                       | 0.05                            | 0.00                                    | 0.10  | 0.033                    |
| <b>VIC + W2 Sep 2020</b>           | 0.25                       | 0.13                            | 0.07                                    | 0.18  | 0.000                    |
| <b>VIC + W3 July 2021</b>          | 0.26                       | 0.14                            | 0.09                                    | 0.18  | 0.000                    |

<sup>a</sup> All estimates are adjusted for caregiver's gender, family structure (sole-caregiving), parent's education, Socio-Economic Indexes for Areas Index of Relative Disadvantage (SEIFA) score, and cultural and linguistic diversity as well as weighted using national demographic distributions for caregiver age, gender, family structure (sole-caregiving, number of children and any under 5 years), state/territory and SEIFA.

<sup>b</sup> Generalised linear model of the binomial family was used for analysis.

## B. Perceived negative impacts of the pandemic on caregiver mental health

|                                    | Proportion <sup>a, b</sup> | Risk Difference <sup>a, b</sup> | 95% Confidence Interval <sup>a, b</sup> |       | p-values <sup>a, b</sup> |
|------------------------------------|----------------------------|---------------------------------|-----------------------------------------|-------|--------------------------|
|                                    |                            |                                 | Lower                                   | Upper |                          |
| <b>Other States + W1 June 2020</b> | 0.44                       |                                 |                                         |       |                          |
| <b>Other States + W2 Sep 2020</b>  | 0.44                       | 0.00                            | -0.09                                   | 0.08  | 0.912                    |
| <b>Other States + W3 July 2021</b> | 0.57                       | 0.12                            | 0.05                                    | 0.19  | 0.000                    |
| <b>NSW + W1 June 2020</b>          | 0.50                       | 0.06                            | -0.02                                   | 0.14  | 0.132                    |
| <b>NSW + W2 Sep 2020</b>           | 0.49                       | 0.05                            | -0.03                                   | 0.13  | 0.224                    |
| <b>NSW + W3 July 2021</b>          | 0.61                       | 0.16                            | 0.09                                    | 0.23  | 0.000                    |
| <b>VIC + W1 June 2020</b>          | 0.50                       | 0.06                            | -0.02                                   | 0.14  | 0.130                    |
| <b>VIC + W2 Sep 2020</b>           | 0.57                       | 0.13                            | 0.05                                    | 0.21  | 0.001                    |
| <b>VIC + W3 July 2021</b>          | 0.67                       | 0.23                            | 0.16                                    | 0.30  | 0.000                    |

<sup>a</sup> All estimates are adjusted for caregiver's gender, family structure (sole-caregiving), parent's education, Socio-Economic Indexes for Areas Index of Relative Disadvantage (SEIFA) score, and cultural and linguistic diversity as well as weighted using national demographic distributions for caregiver age, gender, family structure (sole-caregiving, number of children and any under 5 years), state/territory and SEIFA.

<sup>b</sup> Generalised linear model of the binomial family was used for analysis.

## C. Perceived negative impacts of the pandemic on children's mental health

|                                    | Proportion <sup>a, b</sup> | Risk Difference <sup>a, b</sup> | 95% Confidence Interval <sup>a, b</sup> |       | p-values <sup>a, b</sup> |
|------------------------------------|----------------------------|---------------------------------|-----------------------------------------|-------|--------------------------|
|                                    |                            |                                 | Lower                                   | Upper |                          |
| <b>Other States + W1 June 2020</b> | 0.27                       |                                 |                                         |       |                          |
| <b>Other States + W2 Sep 2020</b>  | 0.21                       | -0.07                           | -0.13                                   | -0.00 | 0.046                    |
| <b>Other States + W3 July 2021</b> | 0.35                       | 0.08                            | 0.02                                    | 0.14  | 0.014                    |
| <b>NSW + W1 June 2020</b>          | 0.27                       | -0.01                           | -0.08                                   | 0.06  | 0.826                    |
| <b>NSW + W2 Sep 2020</b>           | 0.35                       | 0.08                            | 0.00                                    | 0.15  | 0.049                    |
| <b>NSW + W3 July 2021</b>          | 0.48                       | 0.21                            | 0.15                                    | 0.28  | 0.000                    |
| <b>VIC + W1 June 2020</b>          | 0.25                       | -0.02                           | -0.08                                   | 0.04  | 0.527                    |
| <b>VIC + W2 Sep 2020</b>           | 0.42                       | 0.15                            | 0.07                                    | 0.22  | 0.000                    |
| <b>VIC + W3 July 2021</b>          | 0.51                       | 0.24                            | 0.18                                    | 0.30  | 0.000                    |

<sup>a</sup> All estimates are adjusted for caregiver's gender, family structure (sole-caregiving), parent's education, Socio-Economic Indexes for Areas Index of Relative Disadvantage (SEIFA) score, cultural and linguistic diversity, parent's mental health (Kessler-6) and clustering at the level of family as well as weighted using national demographic distributions for caregiver age, gender, family structure (sole-caregiving, number of children and any under 5 years), state/territory and SEIFA.

<sup>b</sup> Generalised linear model of the binomial family was used for analysis.
